# Supplementary material for: Multi-drug resistant bacteria isolates from lymphatic filariasis patients in the Ahanta West District, Ghana
Source: PubMed Central journal article supplement (PMC9552459; doi:10.1186/s12866-022-02624-9), 2022-10-11
Supplement: 12866_2022_2624_MOESM1_ESM.pdf [file 12866_2022_2624_MOESM1_ESM.pdf]

1 **Supplementary sheet for Fig 4**

2

3 **Fig 4: Presence of resistance genes in MDR**

4

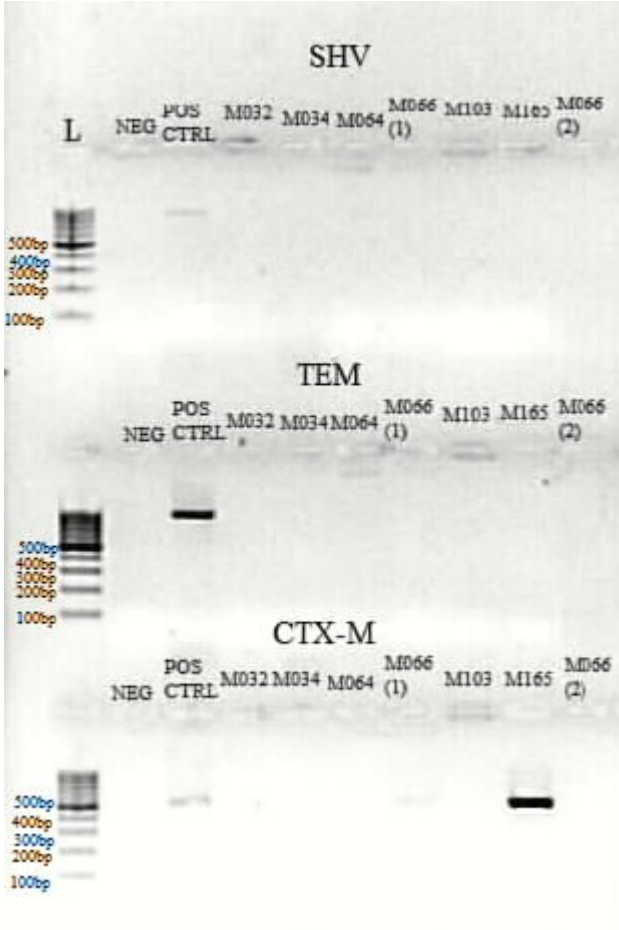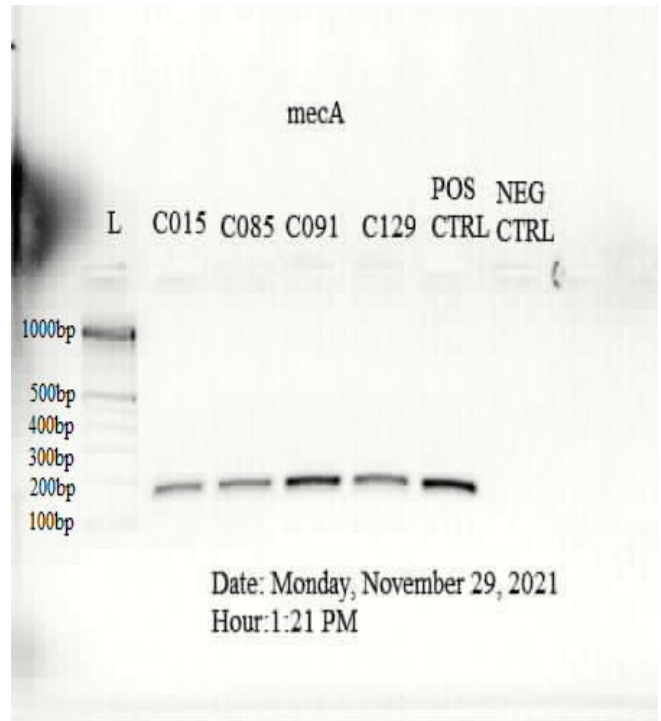

18 Fig 4A: Presence of *bla*CTX-M ESBL gene

Fig 4B: Presence of *mecA* gene

19 Fig 4A is the cropped image of the original gel. Fig4B is the original image of the gel. These images  
20 have their ladder sizes labelled.

21

22

23

24

25

26

27  
28  
29  
30  
31  
32  
33  
34  
35  
36  
37  
38  
39  
40  
41  
42  
43  
44  
45  
46  
47  
48  
49  
50  
51

Fig 4A: Presence of *bla*CTX-M ESBL gene

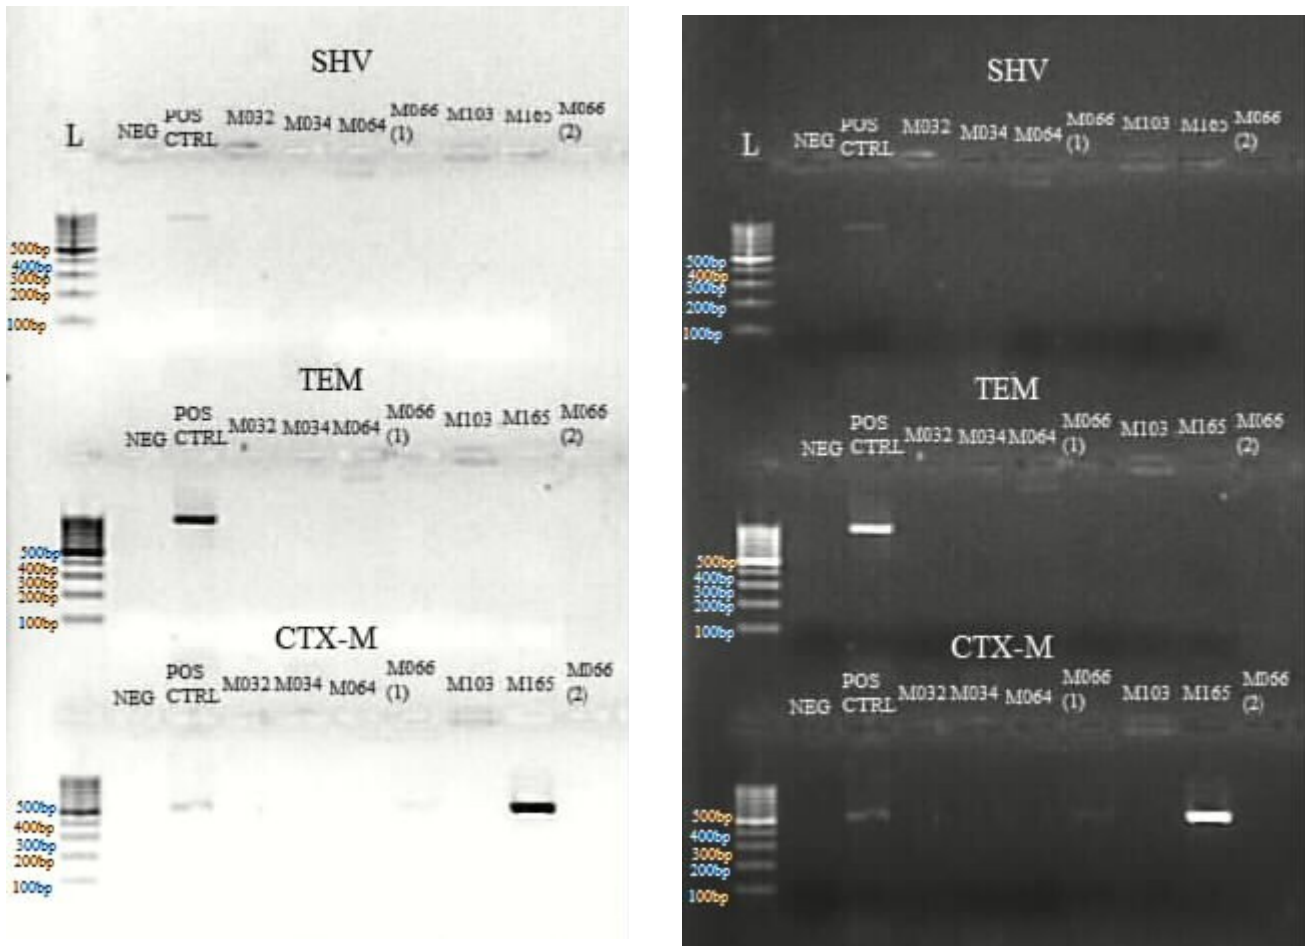

Fig 4A was cropped and different exposure and backgrounds were used to make the labelling more visible.

52

53 Fig 4B: Presence of *mecA* gene

54

55

56

57

58

59

60

61

62

63

64

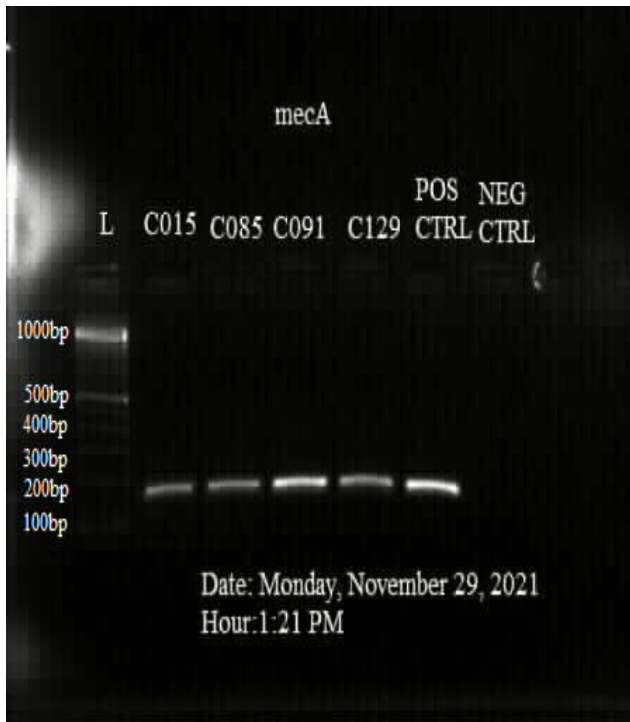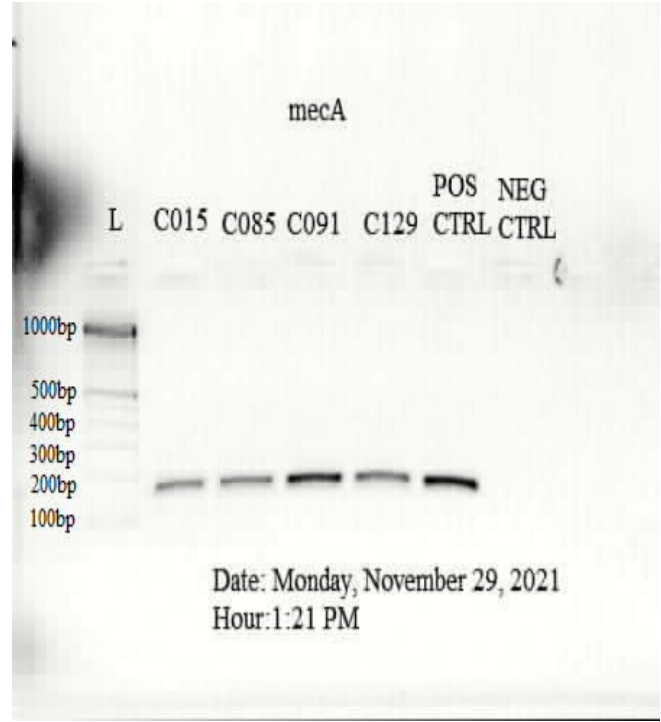

65 Different exposure and backgrounds were used to make the labelling of Fig 4B more visible.

66

67

68

69

70

71

72

73 **Original images of the gels**

74

75

76

77

78

79

80

81

82

83

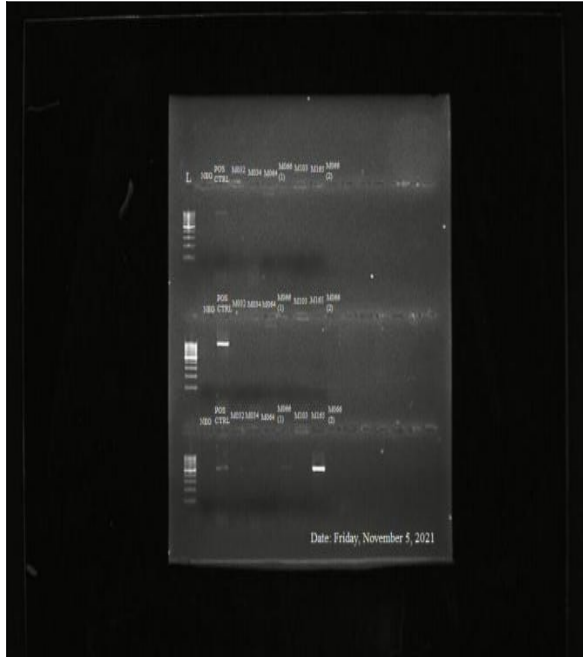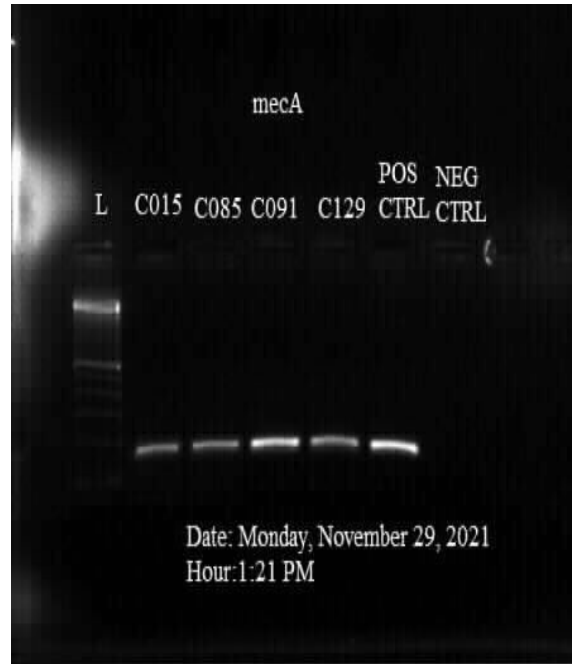

84 The gel for ESBL gene run

The gel for *mecA* gene run

85 The above are the original gels from the run.
